# Supplementary material
Source: publisher site journal article supplement (https://tuhinga.arphahub.com/article/98136/download/suppl/31/)
Supplement: Supplementary file 1

**Additional paired photographs taken in June 1972 and June 2022.**

**Figure S1.** The south-west coast of Mana Island, where Tony Whitaker caught a single McGregor's skink in 1972 (and where they were rediscovered in 2010). **A.** June 1972 (Image: Tony Whitaker, gift of Vivienne Whitaker, 2020, Te Papa CT.067091). **B.** June 2022 (Image: Maarten Holl, Te Papa, 206574).

**Figure S2.** The west coast of Mana Island, looking north-east towards the trig and Kapiti Island. **A.** June 1972 (Image: Tony Whitaker, gift of Vivienne Whitaker, 2020, Te Papa CT.067090). **B.** June 2022 (Image: Maarten Holl, Te Papa, 206591). Note natural recovery of taupata at the foot of the slope.

**Figure S3.** View down Weta Valley to Landing Bay, showing planted vegetation. **A.** June 1972 (Image: Tony Whitaker, gift of Vivienne Whitaker, 2020, Te Papa CT.067088). **B.** June 2022 (Image: Maarten Holl, Te Papa, 206572).

**Figure S4.** Looking south towards South Point, showing planted vegetation. **A.** June 1972 (Image: Tony Whitaker, gift of Vivienne Whitaker, 2020, Te Papa CT.067089). **B.** June 2022 (Image: Maarten Holl, Te Papa, 206605). Note the absence of flax at this site close to where flax weevils were released.

**Figure S5.** View south-east from Shearwater Point, with Mike Daniel and Mike Meads inspecting sooty shearwater burrows in 1972. **A.** June 1972 (Image: Tony Whitaker, gift of Vivienne Whitaker, 2020, Te Papa CT.067092). **B.** June 2022 (Image: Maarten Holl, Te Papa, 206575).

**Figure S6.** View south-west along the west coast of Mana Island, showing natural regeneration of taupata. **A.** June 1972 (Image: Tony Whitaker, gift of Vivienne Whitaker, 2020, Te Papa CT.067095). **B.** June 2022 (Image: Colin Miskelly).

**Figure S7.** View south-west from near the trig, showing natural regeneration on the western slopes. **A.** June 1972 (Image: Tony Whitaker, gift of Vivienne Whitaker, 2020, Te Papa CT.067099). **B.** June 2022 (Image: Maarten Holl, Te Papa, 206580).

**Figure S8.** View south-west across Landing Bay. **A.** June 1972 (Image: Tony Whitaker, gift of Vivienne Whitaker, 2020, Te Papa CT.067094). **B.** June 2022 (Image: Maarten Holl, Te Papa, 206601).



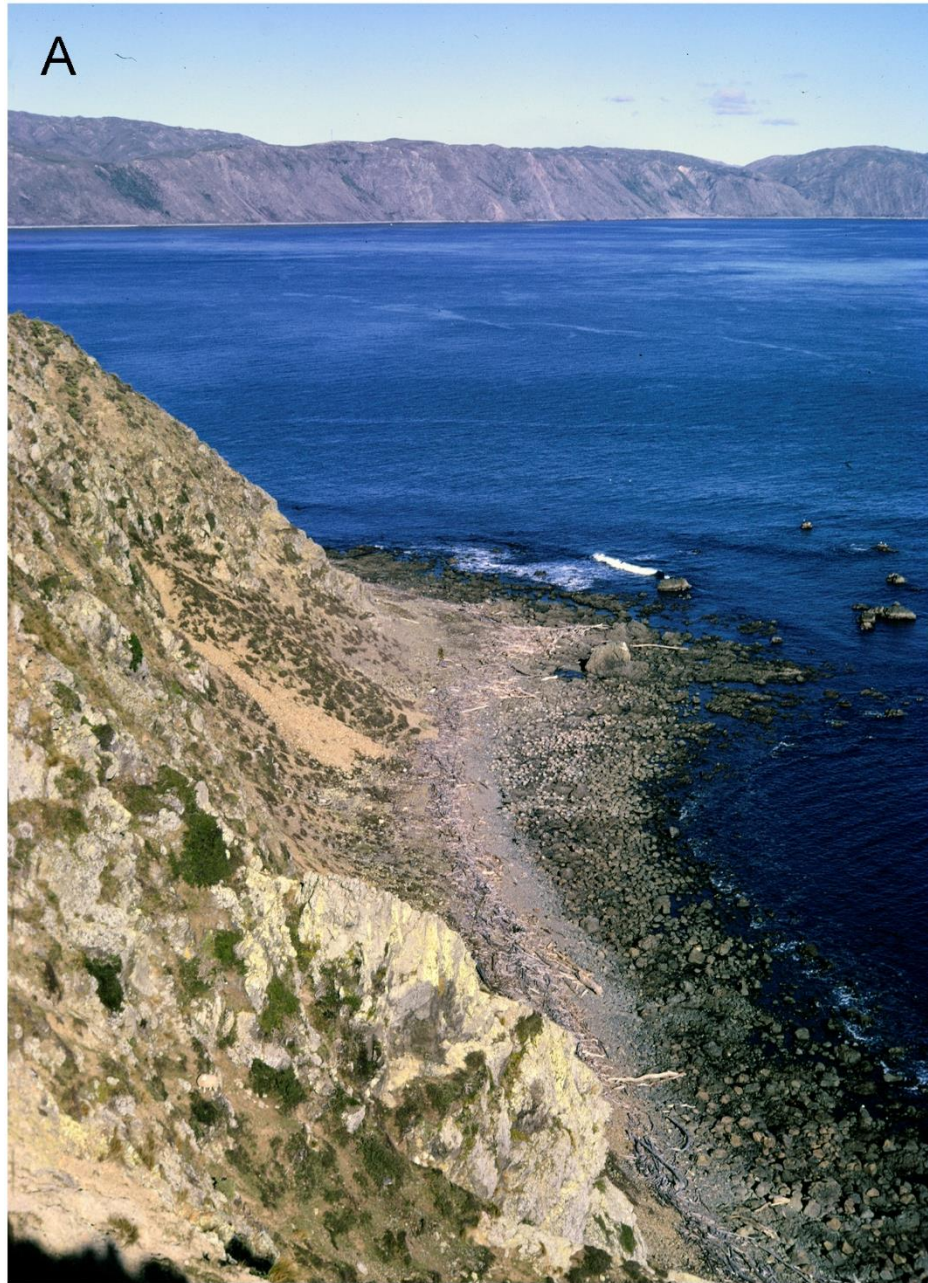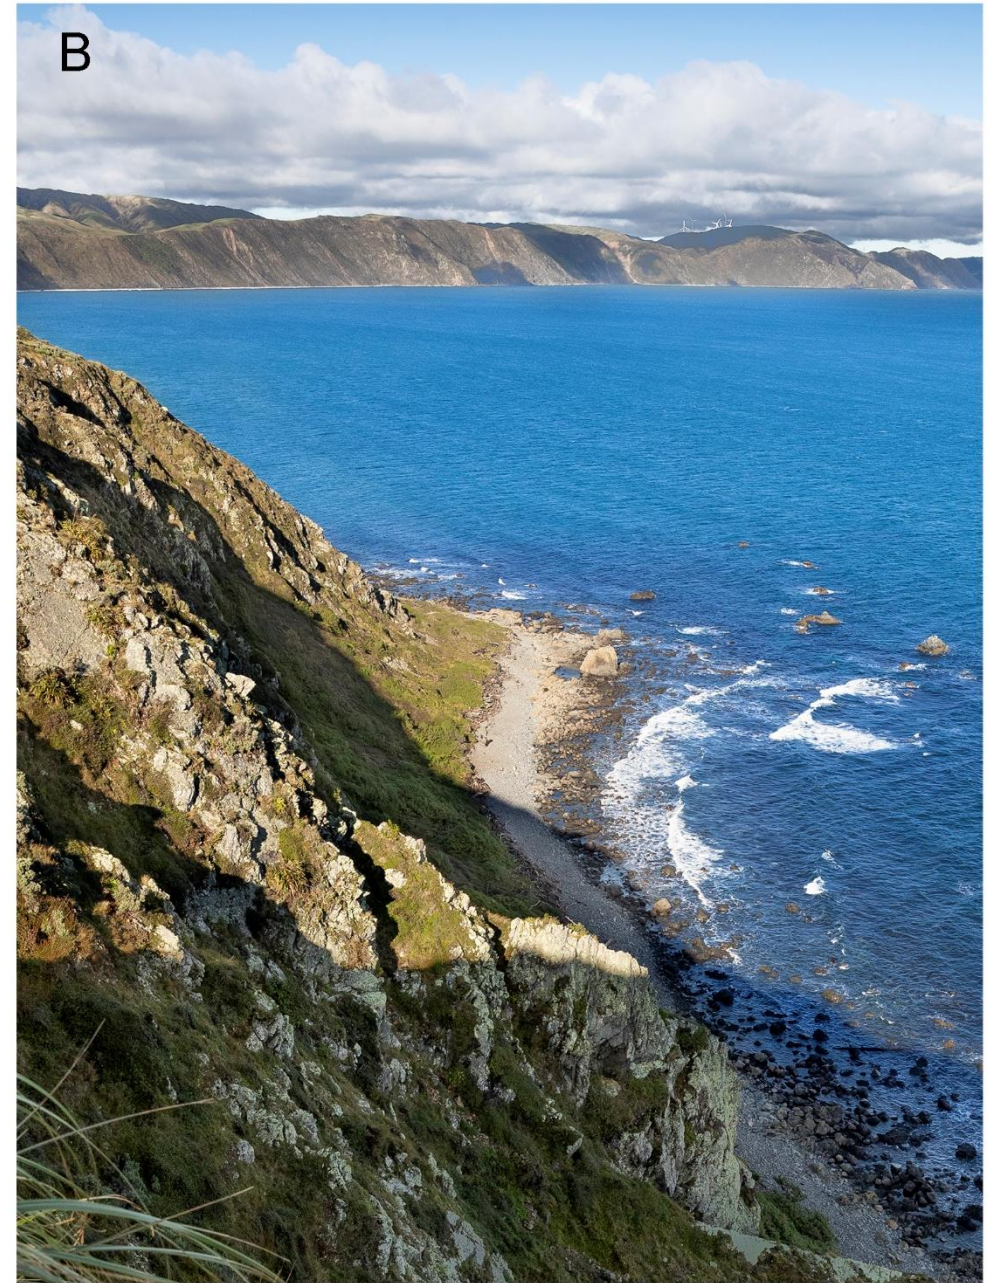

**Figure S1.** The south-west coast of Mana Island, where Tony Whitaker caught a single McGregor's skink in 1972 (and where they were rediscovered in 2010). **A.** June 1972 (Image: Tony Whitaker, gift of Vivienne Whitaker, 2020, Te Papa CT.067091). **B.** June 2022 (Image: Maarten Holl, Te Papa, 206574).



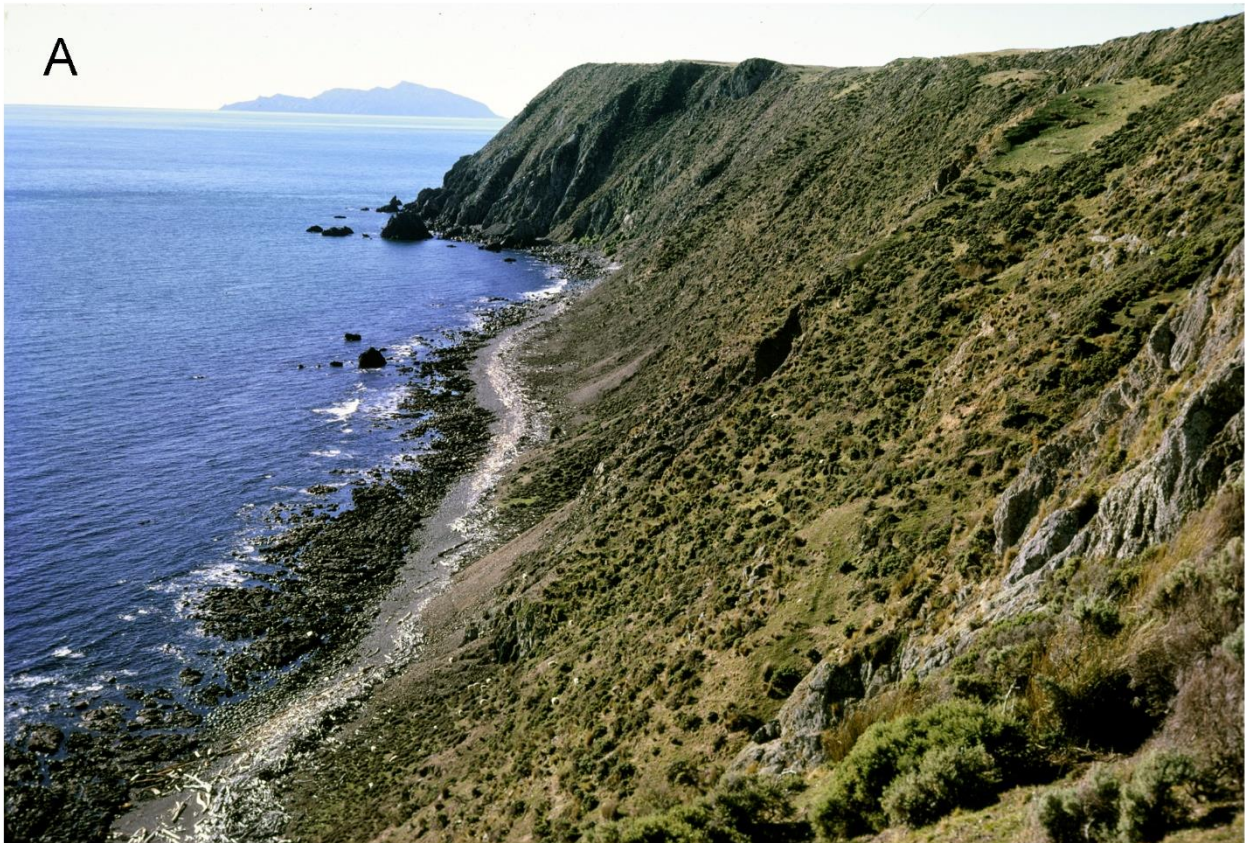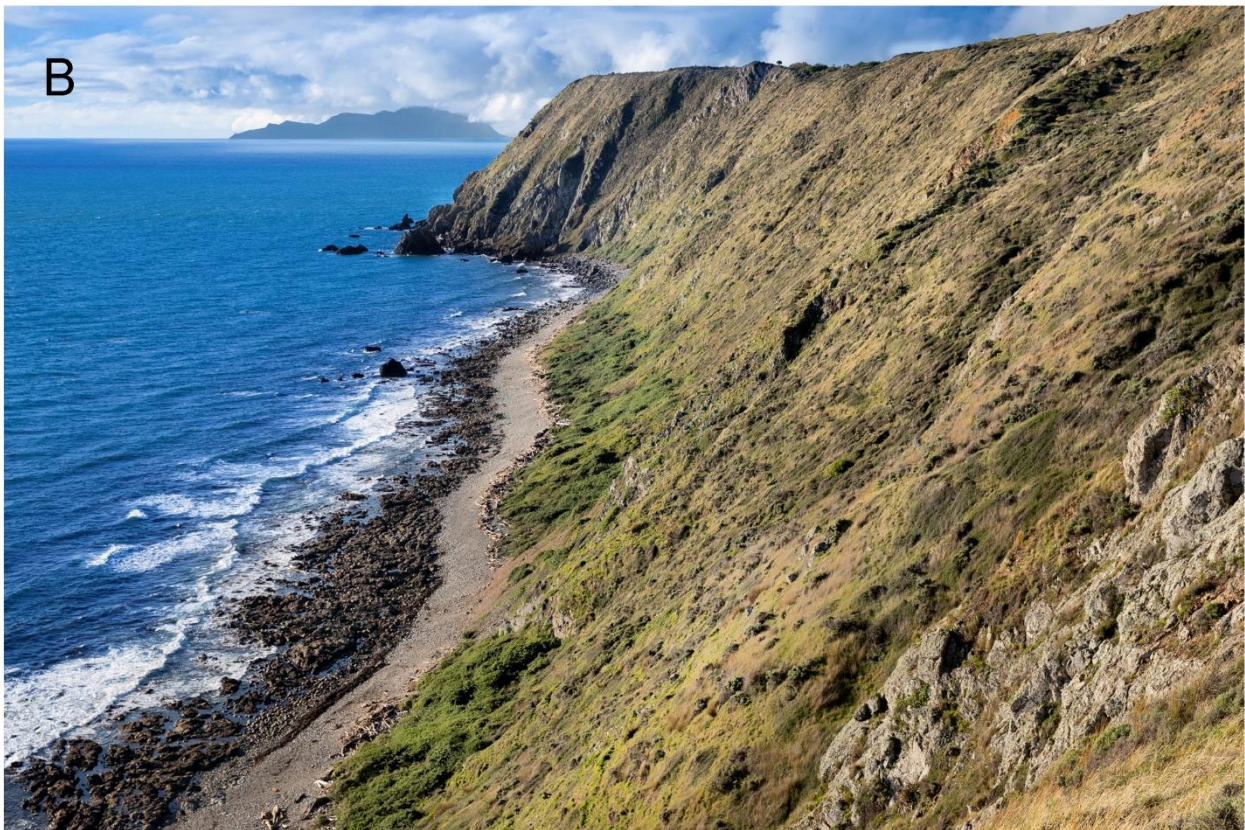

**Figure S2.** The west coast of Mana Island, looking north-east towards the trig and Kapiti Island. **A.** June 1972 (Image: Tony Whitaker, gift of Vivienne Whitaker, 2020, Te Papa CT.067090). **B.** June 2022 (Image: Maarten Holl, Te Papa, 206591). Note natural recovery of taupata at the foot of the slope.



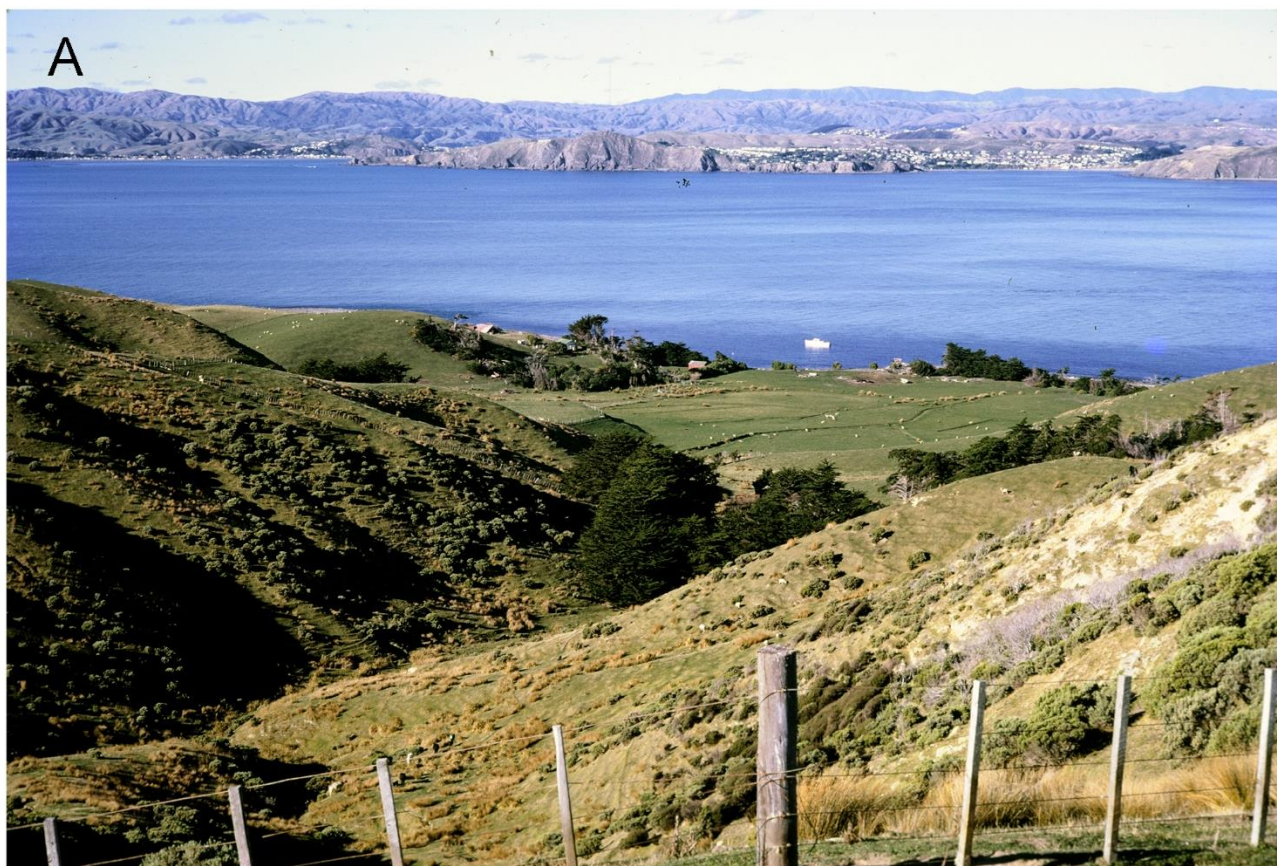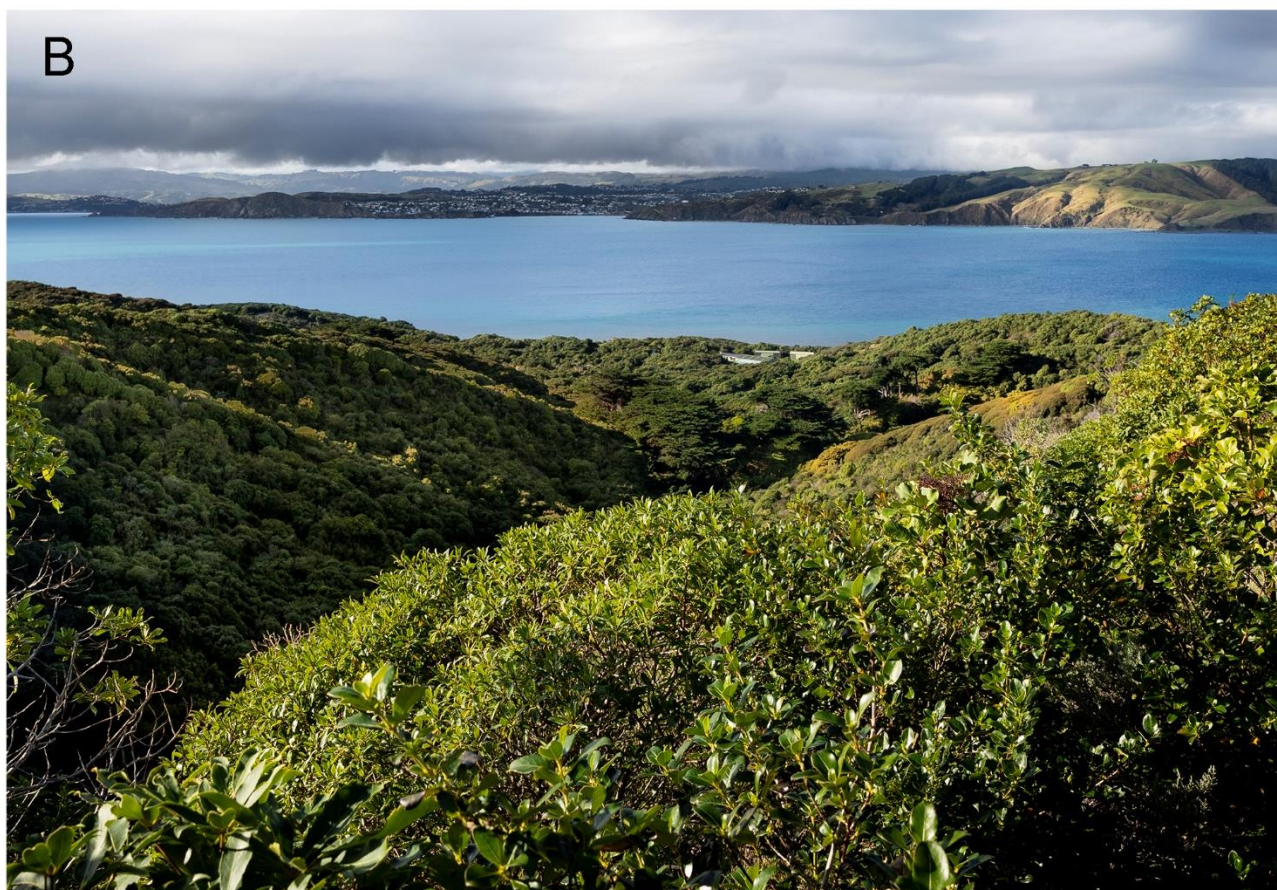

**Figure S3.** View down Weta Valley to Landing Bay, showing planted vegetation. **A.** June 1972 (Image: Tony Whitaker, gift of Vivienne Whitaker, 2020, Te Papa CT.067088). **B.** June 2022 (Image: Maarten Holl, Te Papa, 206572).



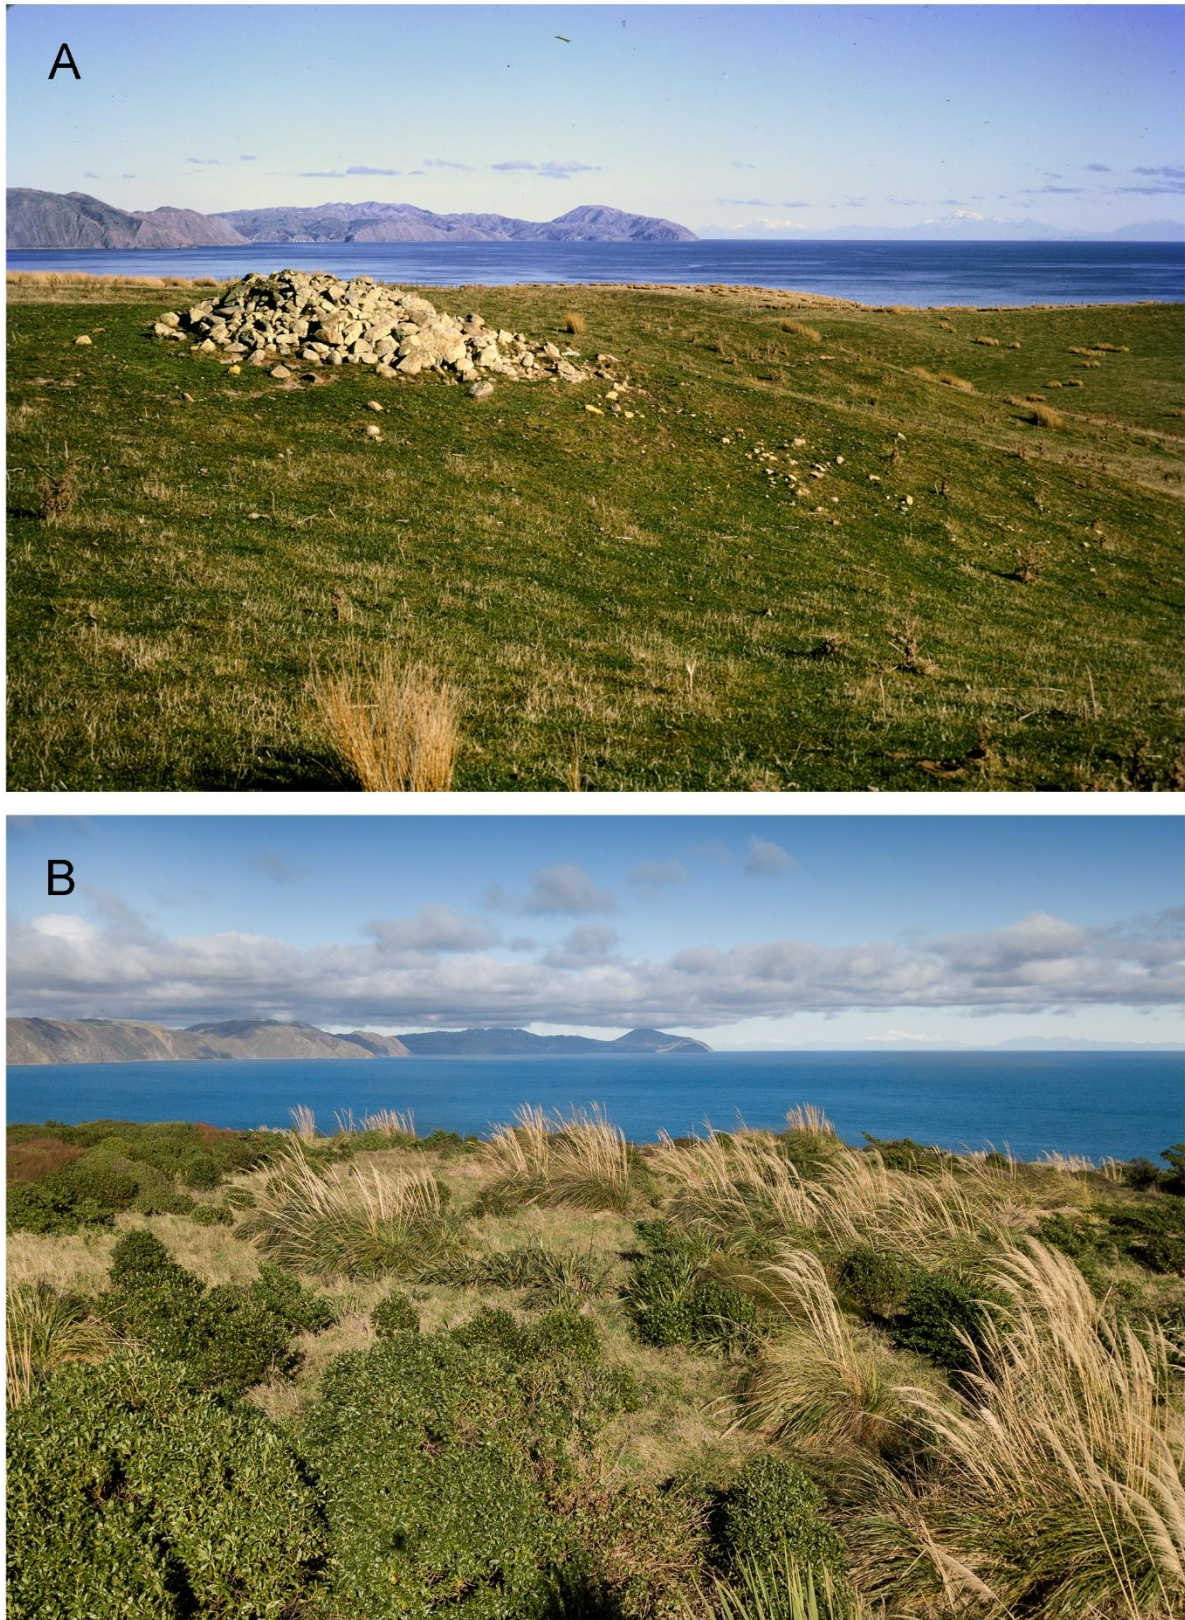

**Figure S4.** Looking south towards South Point, showing planted vegetation. **A.** June 1972 (Image: Tony Whitaker, gift of Vivienne Whitaker, 2020, Te Papa CT.067089). **B.** June 2022 (Image: Maarten Holl, Te Papa, 206605). Note the absence of flax at this site close to where flax weevils were released.



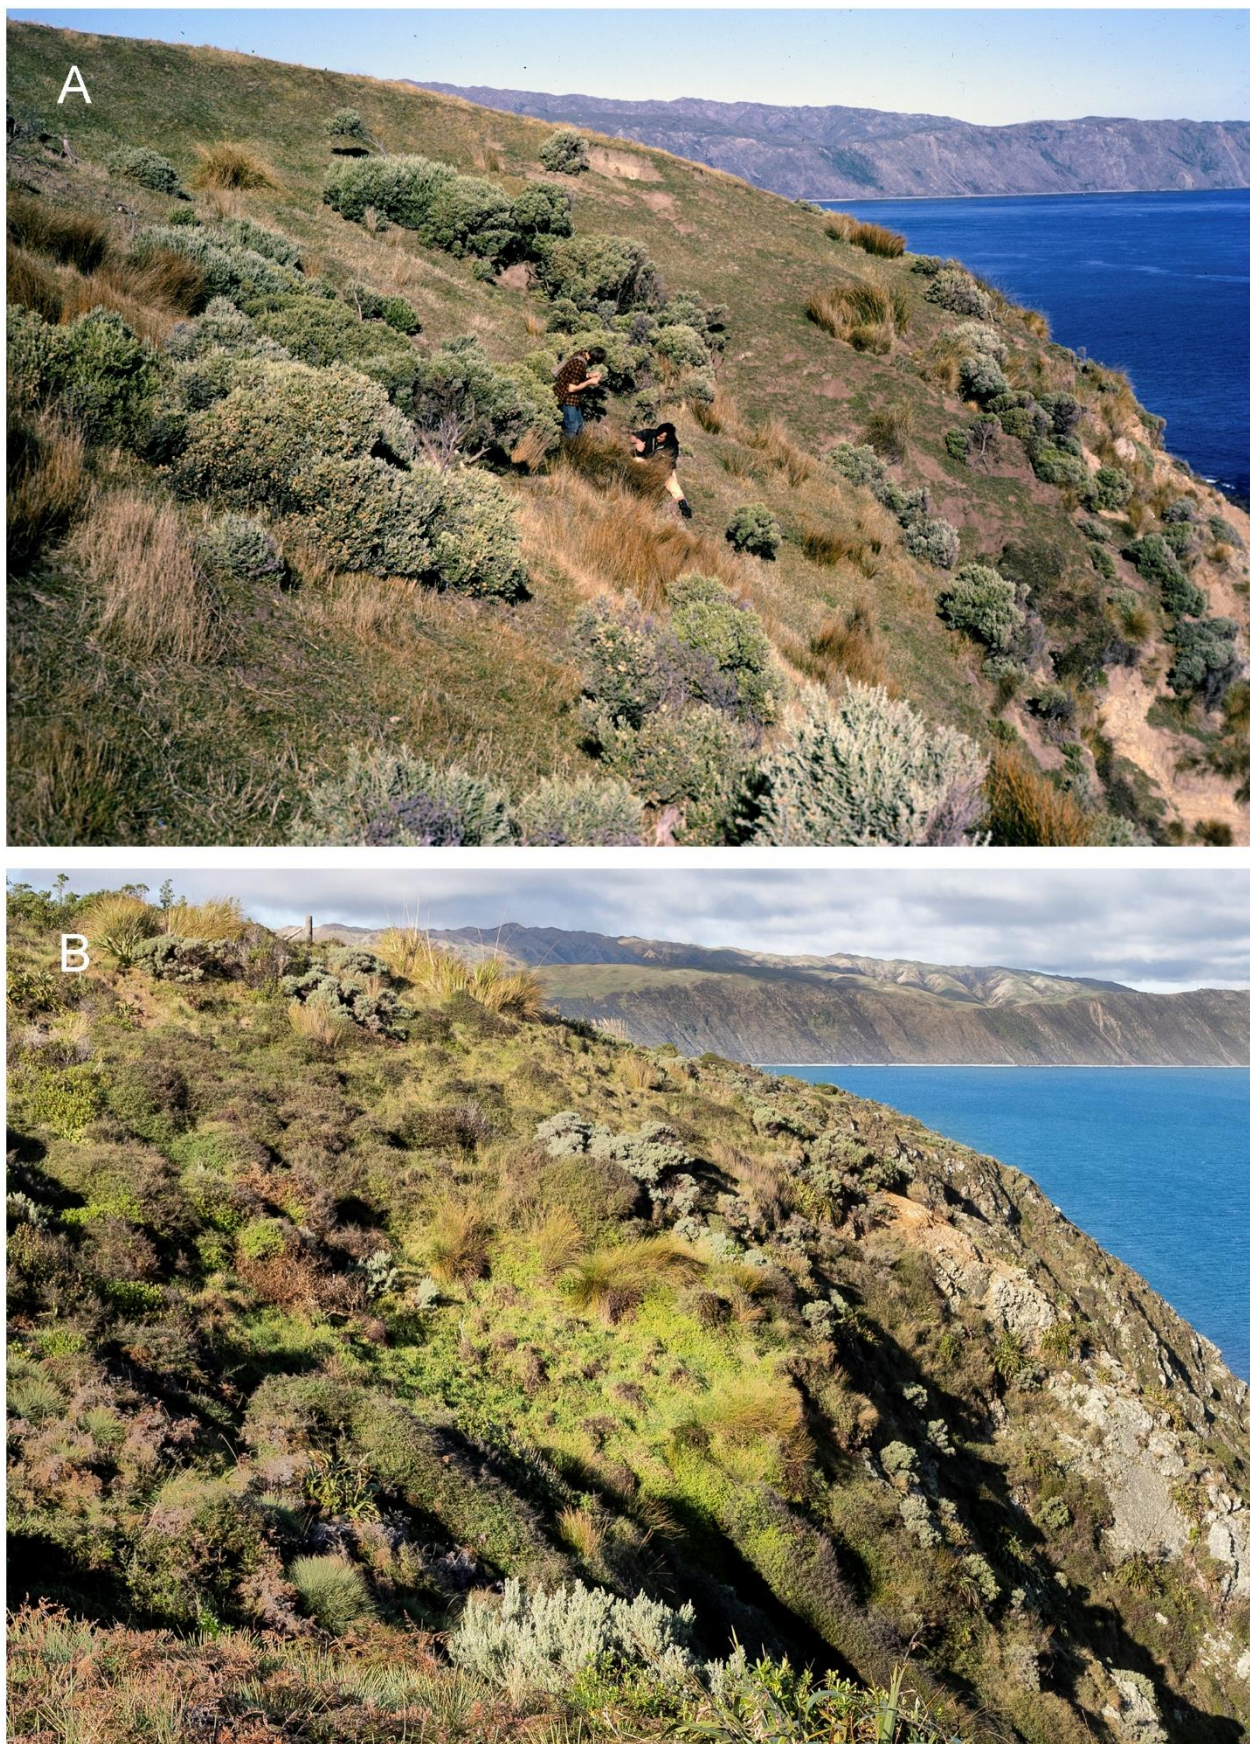

**Figure S5.** View south-east from Shearwater Point, with Mike Daniel and Mike Meads inspecting sooty shearwater burrows in 1972. **A.** June 1972 (Image: Tony Whitaker, gift of Vivienne Whitaker, 2020, Te Papa CT.067092). **B.** June 2022 (Image: Maarten Holl, Te Papa, 206575).



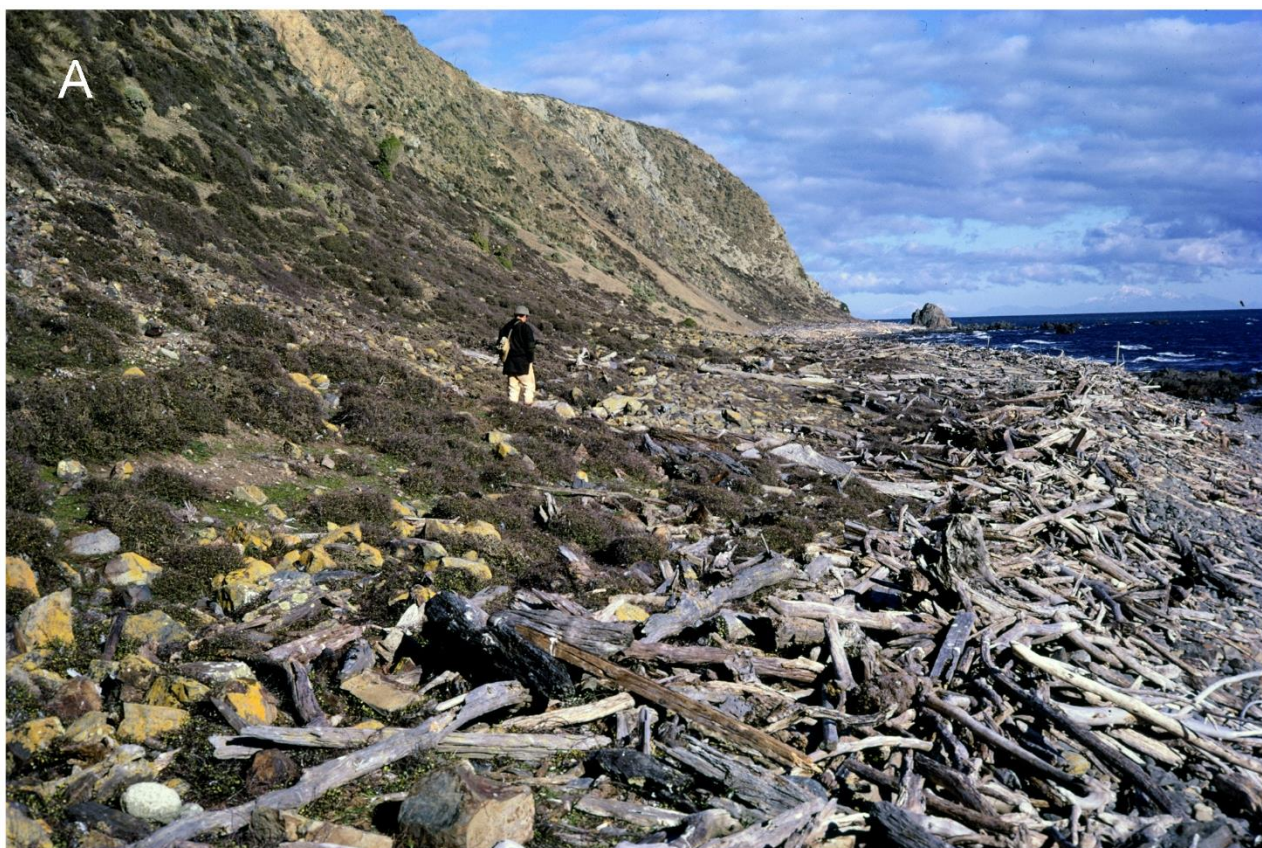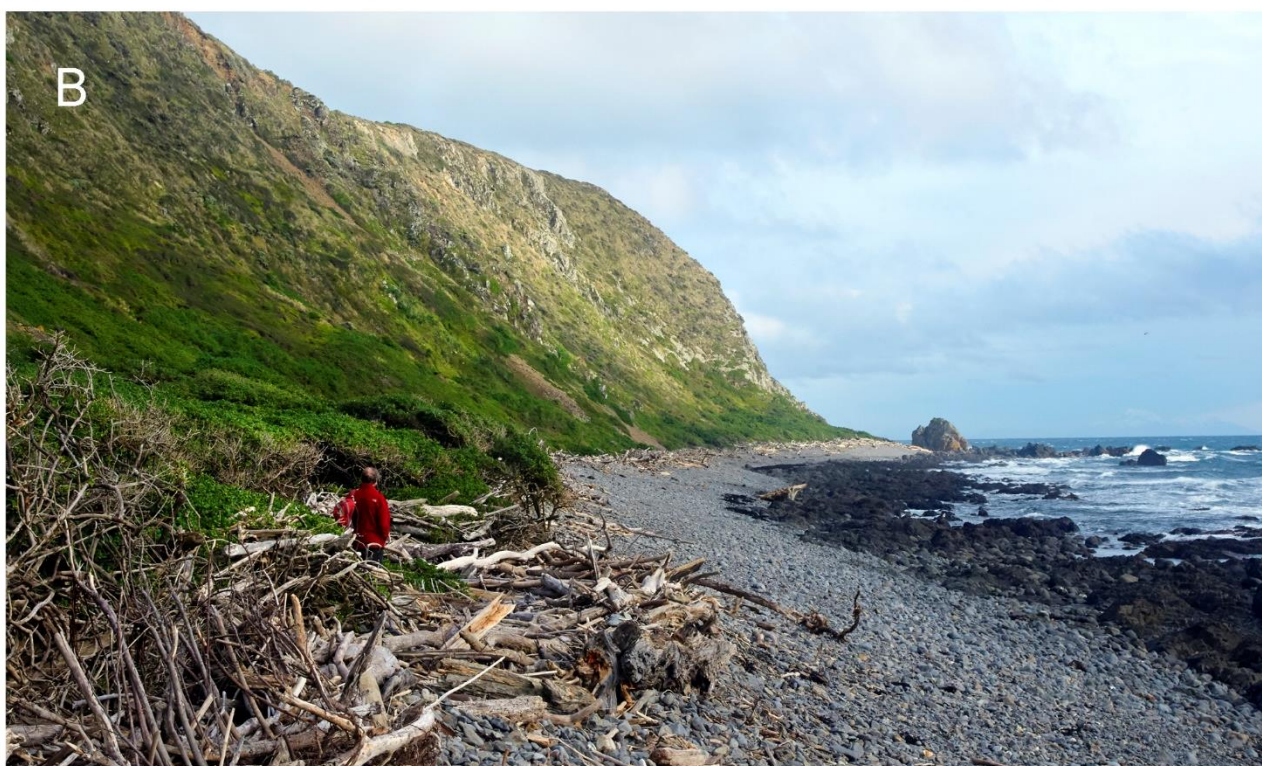

**Figure S6.** View south-west along the west coast of Mana Island, showing natural regeneration of taupata. **A.** June 1972 (Image: Tony Whitaker, gift of Vivienne Whitaker, 2020, Te Papa CT.067095). **B.** June 2022 (Image: Colin Miskelly).



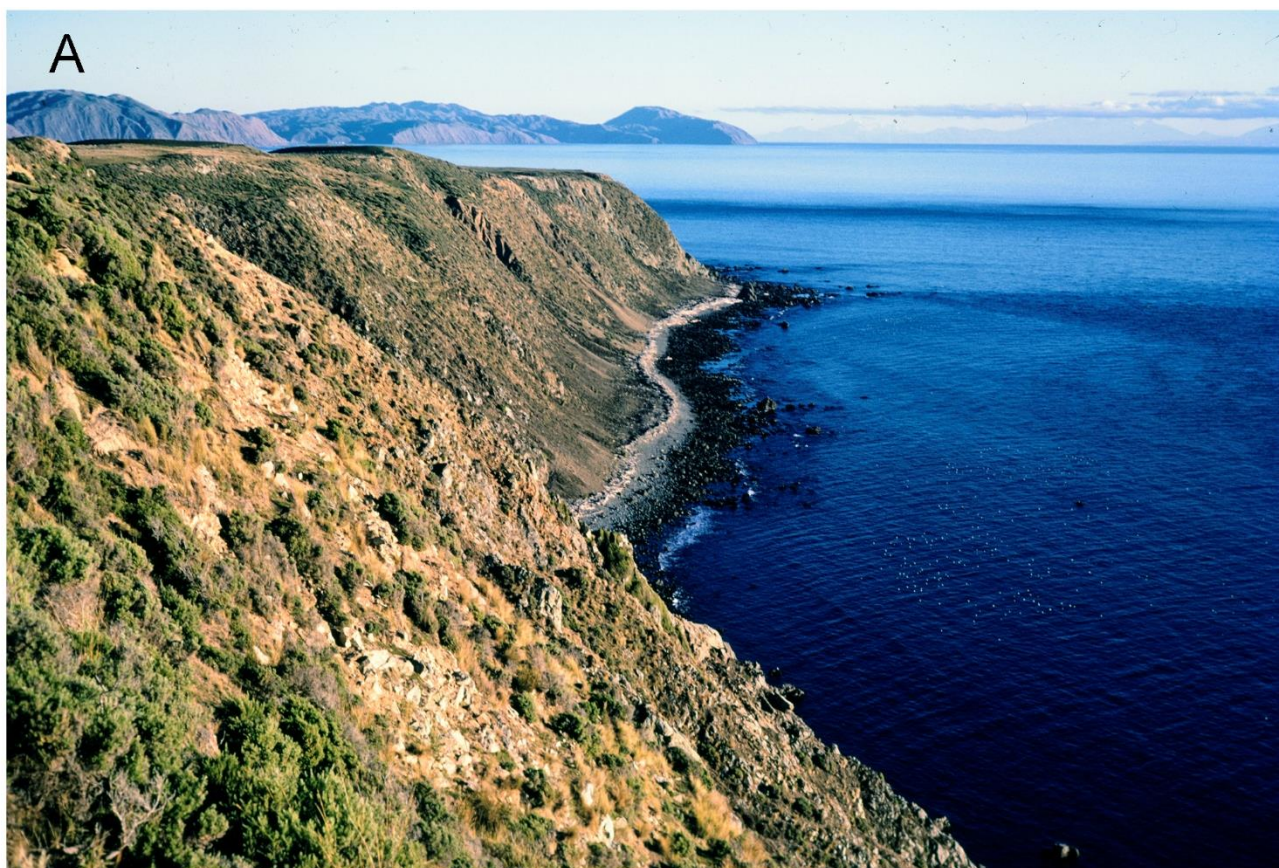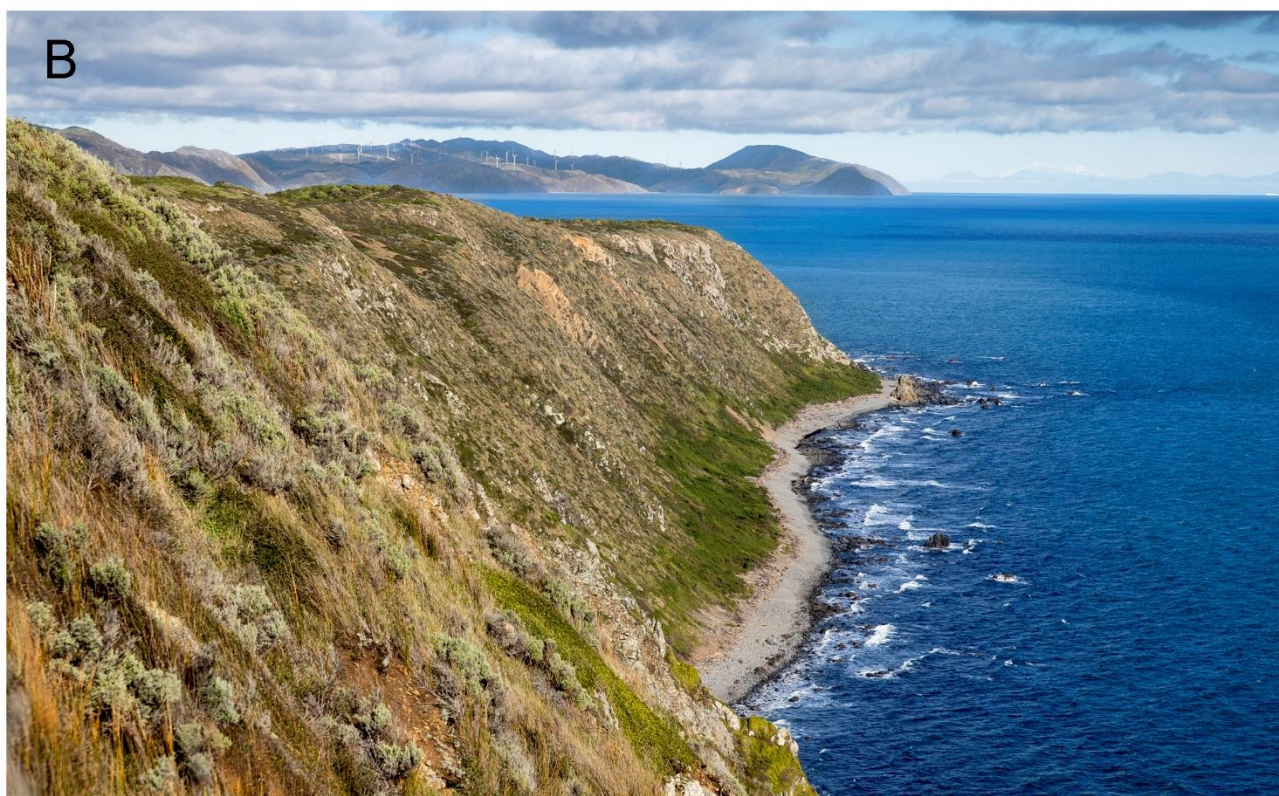

**Figure S7.** View south-west from near the trig, showing natural regeneration on the western slopes. **A.** June 1972 (Image: Tony Whitaker, gift of Vivienne Whitaker, 2020, Te Papa CT.067099). **B.** June 2022 (Image: Maarten Holl, Te Papa, 206580).



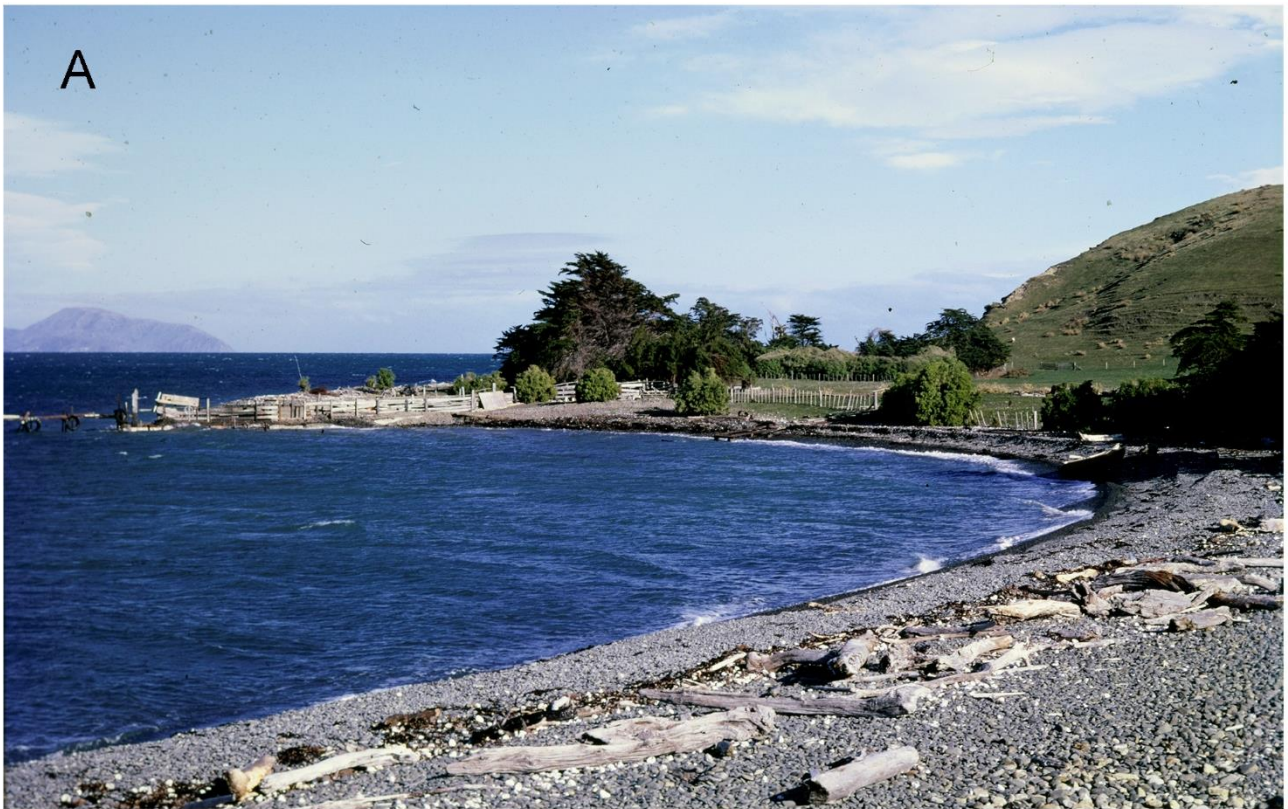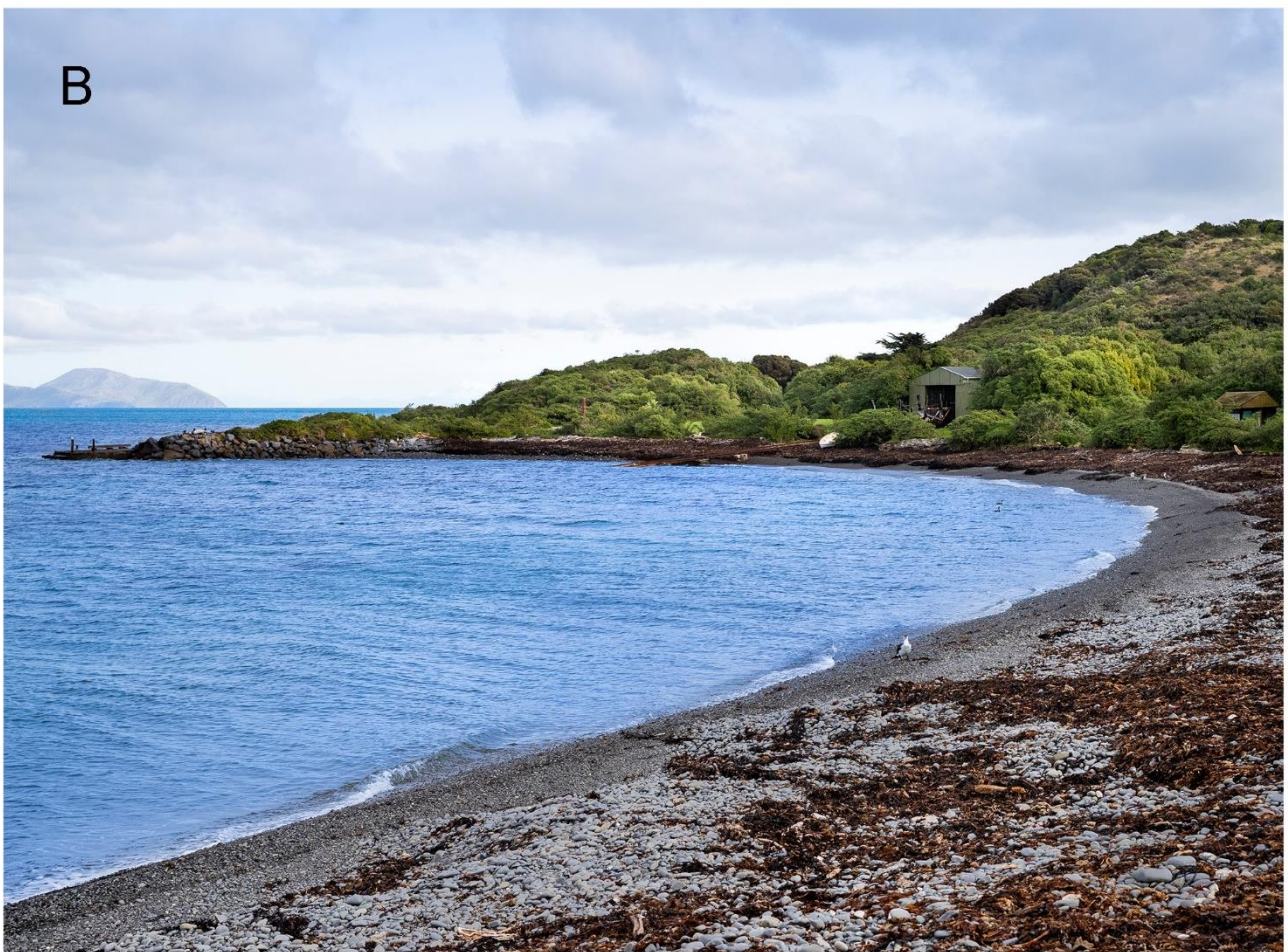

**Figure S8.** View south-west across Landing Bay. **A.** June 1972 (Image: Tony Whitaker, gift of Vivienne Whitaker, 2020, Te Papa CT.067094). **B.** June 2022 (Image: Maarten Holl, Te Papa, 206601).
